# Supplementary material
Source: MDPI journal article supplement (https://www.mdpi.com/1996-1073/15/15/5377)
Supplement: s1 [file s1]

# Individual phenolic acids in distillery stillage inhibit its biomethanization

Wioleta Mikucka\*, Magdalena Zielinska

University of Warmia and Mazury in Olsztyn, Faculty of Geoengineering,  
Department of Environmental Biotechnology, Słoneczna St. 45G, 10-709 Olsztyn,  
Poland; wioleta.mikucka@uwm.edu.pl (W.M.); magdalena.zielinska@uwm.edu.pl  
(M.Z.)

\*Correspondence: wioleta.mikucka@uwm.edu.pl (W.M.)

## Supplementary Materials

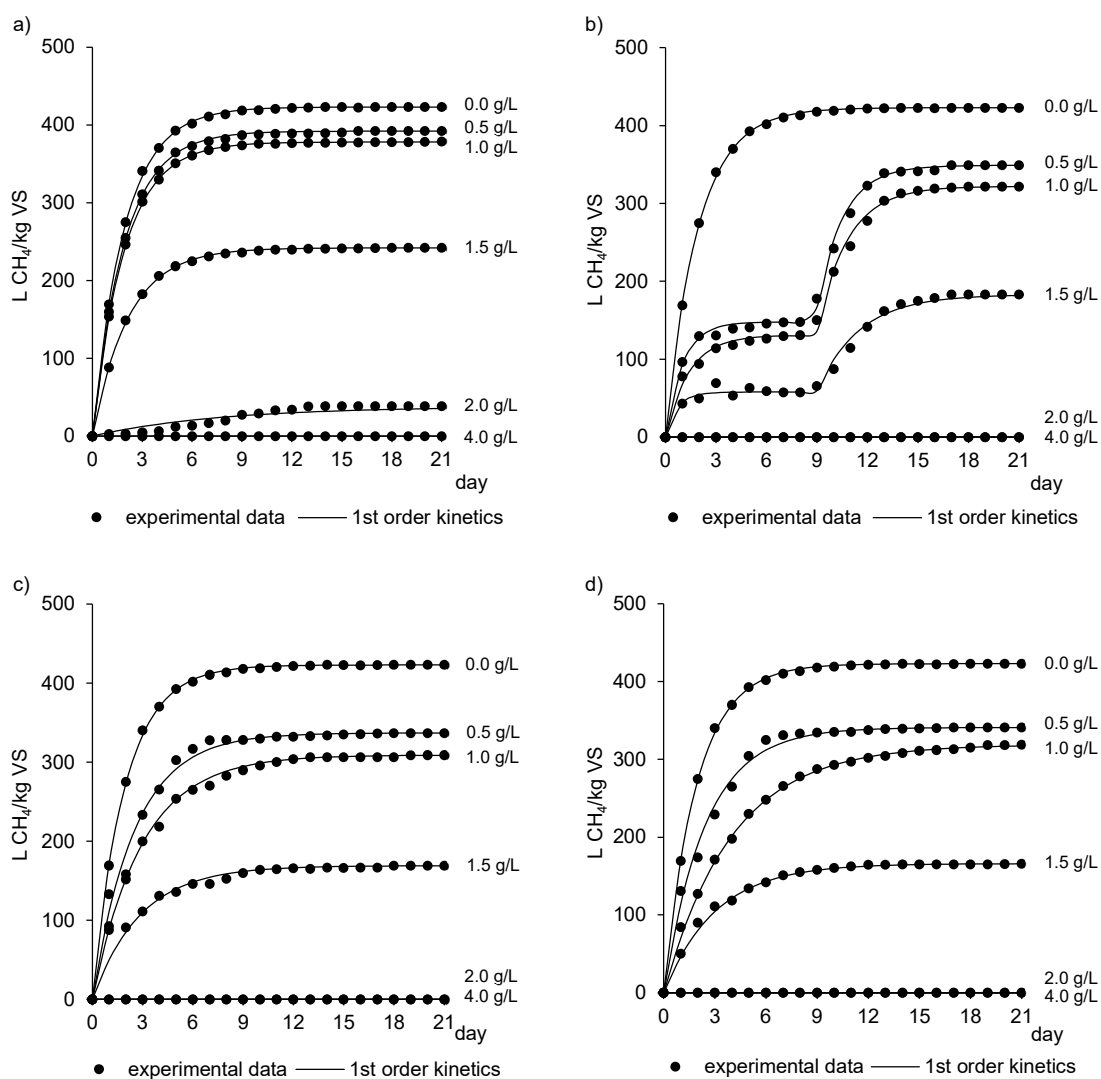

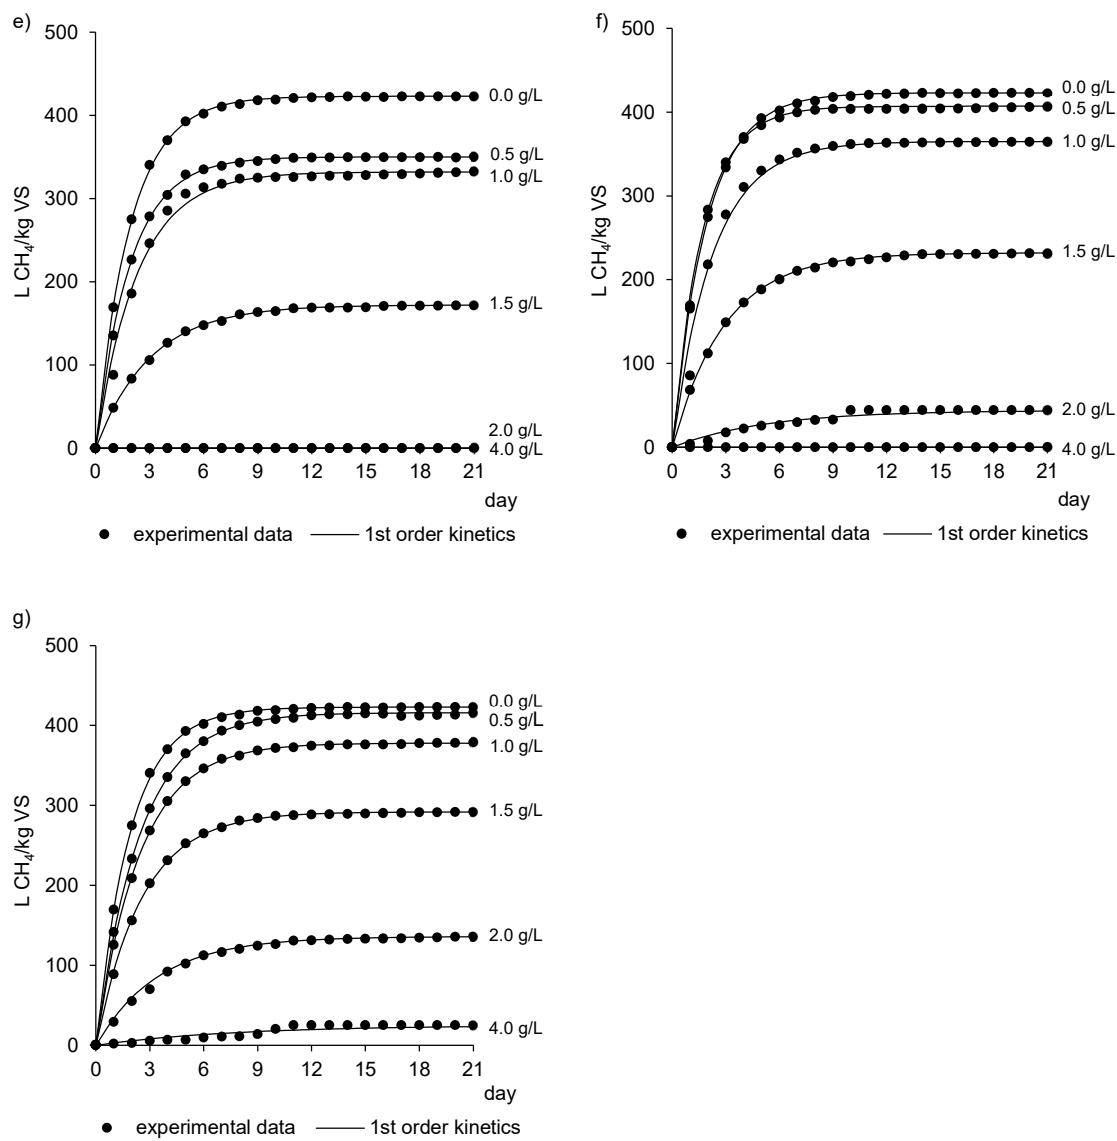

Figure S1. Time course of methane production from distillery stillage with a) *p*-OH benzoic, b) vanillic, c) ferulic, d) syringic, e) *p*-coumaric, f) sinapic, g) mixture of phenolic acids

Table S1. Biogas production

| Type of sample                    | Biogas production |                 |
|-----------------------------------|-------------------|-----------------|
|                                   | L/kg VS           | L/kg Fresh Mass |
| control sample                    | 544.88            | 43.25           |
| 0.5 g/L p-OH benzoic              | 510.20            | 40.50           |
| 1 g/L p-OH benzoic                | 497.87            | 39.52           |
| 1.5 g/L p-OH benzoic              | 395.33            | 31.38           |
| 2 g/L p-OH benzoic                | 70.81             | 5.62            |
| 4 g/L p-OH benzoic                | 0                 | 0               |
| 0.5 g/L vanillic                  | 469.42            | 37.26           |
| 1 g/L vanillic                    | 445.44            | 35.36           |
| 1.5 g/L vanillic                  | 303.52            | 24.09           |
| 2 g/L vanillic                    | 0                 | 0               |
| 4 g/L vanillic                    | 0                 | 0               |
| 0.5 g/L ferulic                   | 457.62            | 36.32           |
| 1 g/L ferulic                     | 428.74            | 34.03           |
| 1.5 g/L ferulic                   | 289.11            | 22.95           |
| 2 g/L ferulic                     | 0                 | 0               |
| 4 g/L ferulic                     | 0                 | 0               |
| 0.5 g/L syringic                  | 463.95            | 36.83           |
| 1 g/L syringic                    | 437.45            | 34.72           |
| 1.5 g/L syringic                  | 276.39            | 21.94           |
| 2 g/L syringic                    | 0                 | 0               |
| 4 g/L syringic                    | 0                 | 0               |
| 0.5 g/L <i>p</i> -coumaric        | 481.61            | 38.23           |
| 1 g/L <i>p</i> -coumaric          | 462.54            | 36.71           |
| 1.5 g/L <i>p</i> -coumaric        | 285.87            | 22.69           |
| 2 g/L <i>p</i> -coumaric          | 0                 | 0               |
| 4 g/L <i>p</i> -coumaric          | 0                 | 0               |
| 0.5 g/L sinapic                   | 531.02            | 42.15           |
| 1 g/L sinapic                     | 484.54            | 38.46           |
| 1.5 g/L sinapic                   | 361.49            | 28.69           |
| 2 g/L sinapic                     | 79.40             | 6.30            |
| 4 g/L sinapic                     | 0                 | 0               |
| 0.5 g/L mixture of phenolic acids | 539.38            | 42.81           |

|                                   |        |       |
|-----------------------------------|--------|-------|
| 1 g/L mixture of phenolic acids   | 496.30 | 39.39 |
| 1.5 g/L mixture of phenolic acids | 428.67 | 34.03 |
| 2 g/L mixture of phenolic acids   | 215.78 | 17.13 |
| 4 g/L mixture of phenolic acids   | 48.58  | 3.86  |

---

Table S2. Characteristics of digestate in series 1 and 2

| Type of sample       | Removal efficiency (%) |      |      |      |      | Anaerobic digestion indicators |                       |                |                                |              |
|----------------------|------------------------|------|------|------|------|--------------------------------|-----------------------|----------------|--------------------------------|--------------|
|                      | TS                     | VS   | COD  | TOC  | DOC  | pH                             | Alkalinity<br>(meq/L) | VFAs<br>(mg/L) | Ammonium<br>nitrogen<br>(mg/L) | TP<br>(mg/L) |
| control sample       | 54.1                   | 57.2 | 54.7 | 65.1 | 59.5 | 7.42                           | 191.5                 | 1547.8         | 342.2                          | 192.7        |
| 0.5 g/L p-OH benzoic | 52.1                   | 57.5 | 53.7 | 65.8 | 58.3 | 7.39                           | 186.4                 | 1623.9         | 302.0                          | 195.3        |
| 1 g/L p-OH benzoic   | 50.3                   | 55.4 | 51.5 | 62.9 | 56.4 | 7.38                           | 176.0                 | 1845.34        | 385.6                          | 218.7        |
| 1.5 g/L p-OH benzoic | 47.5                   | 53.8 | 51.3 | 60.5 | 53.7 | 7.34                           | 169.1                 | 2037.4         | 435.9                          | 257.3        |
| 2 g/L p-OH benzoic   | 45.8                   | 46.5 | 42.9 | 51.2 | 48.9 | 7.35                           | 158.8                 | 2579.0         | 548.7                          | 289.1        |
| 4 g/L p-OH benzoic   | 18.2                   | 21.4 | 25.8 | 27.1 | 23.4 | 7.29                           | 135.4                 | 3056.2         | 632.6                          | 315.1        |
| 0.5 g/L vanillic     | 50.3                   | 55.9 | 53.7 | 61.4 | 55.3 | 7.42                           | 184.2                 | 1396.8         | 312.5                          | 187.3        |
| 1 g/L vanillic       | 49.2                   | 54.4 | 52.7 | 60.4 | 54.7 | 7.40                           | 175.4                 | 1436.9         | 368.2                          | 191.2        |
| 1.5 g/L vanillic     | 47.2                   | 53.2 | 51.0 | 58.1 | 52.3 | 7.36                           | 162.2                 | 1968.3         | 465.7                          | 199.8        |
| 2 g/L vanillic       | 44.9                   | 47.2 | 41.5 | 49.2 | 47.6 | 7.29                           | 151.6                 | 2498.7         | 501.4                          | 256.4        |
| 4 g/L vanillic       | 16.6                   | 20.3 | 27.3 | 25.2 | 21.3 | 7.18                           | 134.5                 | 3125.7         | 598.7                          | 298.7        |
| 0.5 g/L ferulic      | 46.7                   | 50.2 | 49.7 | 58.5 | 51.1 | 7.38                           | 180.5                 | 1498.7         | 294.7                          | 202.4        |
| 1 g/L ferulic        | 46.4                   | 51.1 | 49.3 | 55.5 | 51.8 | 7.35                           | 165.8                 | 1758.3         | 385.7                          | 257.2        |
| 1.5 g/L ferulic      | 45.4                   | 51.2 | 47.4 | 55.6 | 52.4 | 7.23                           | 148.2                 | 2145.1         | 537.3                          | 289.5        |
| 2 g/L ferulic        | 37.3                   | 43.0 | 40.5 | 48.4 | 44.7 | 7.04                           | 135.2                 | 2745.4         | 602.7                          | 328.7        |
| 4 g/L ferulic        | 12.2                   | 16.3 | 23.6 | 25.3 | 19.5 | 6.89                           | 127.4                 | 3423.5         | 658.2                          | 368.6        |
| 0.5 g/L syringic     | 47.3                   | 50.5 | 50.3 | 60.1 | 53.2 | 7.35                           | 182.1                 | 1475.7         | 285.5                          | 189.7        |
| 1 g/L syringic       | 46.6                   | 50.5 | 50.2 | 60.2 | 52.4 | 7.35                           | 168.7                 | 1859.3         | 367.0                          | 199.0        |

|                                   |      |      |      |      |      |      |       |        |       |       |
|-----------------------------------|------|------|------|------|------|------|-------|--------|-------|-------|
| 1.5 g/L syringic                  | 46.7 | 49.9 | 48.5 | 57.2 | 52.0 | 7.29 | 154.2 | 2036.4 | 498.4 | 222.8 |
| 2 g/L syringic                    | 39.3 | 44.9 | 41.2 | 47.7 | 42.3 | 6.98 | 139.5 | 2746.9 | 572.1 | 243.7 |
| 4 g/L syringic                    | 15.1 | 17.8 | 22.3 | 26.8 | 21.4 | 6.88 | 132.3 | 3356.3 | 682.7 | 287.5 |
| 0.5 g/L <i>p</i> -coumaric        | 48.2 | 53.3 | 53.3 | 57.3 | 53.5 | 7.32 | 181.5 | 1368.5 | 302.2 | 192.7 |
| 1 g/L <i>p</i> -coumaric          | 47.9 | 52.5 | 52.3 | 57.7 | 51.4 | 7.29 | 179.0 | 1689.6 | 375.2 | 195.4 |
| 1.5 g/L <i>p</i> -coumaric        | 46.7 | 52.4 | 51.3 | 56.4 | 50.5 | 7.21 | 157.4 | 2584.0 | 453.3 | 207.1 |
| 2 g/L <i>p</i> -coumaric          | 39.0 | 42.6 | 39.6 | 49.4 | 42.9 | 7.01 | 139.9 | 2987.7 | 503.5 | 267.0 |
| 4 g/L <i>p</i> -coumaric          | 13.2 | 18.4 | 23.9 | 25.6 | 19.8 | 6.85 | 128.6 | 3398.9 | 628.0 | 330.2 |
| 0.5 g/L sinapic                   | 52.5 | 55.4 | 53.2 | 62.5 | 57.0 | 7.42 | 185.2 | 1589.6 | 298.8 | 189.6 |
| 1 g/L sinapic                     | 51.2 | 54.4 | 53.4 | 59.7 | 55.6 | 7.41 | 168.2 | 1687.6 | 328.5 | 193.6 |
| 1.5 g/L sinapic                   | 43.0 | 54.0 | 53.5 | 57.7 | 52.8 | 7.38 | 159.1 | 1789.6 | 402.9 | 201.3 |
| 2 g/L sinapic                     | 42.8 | 45.7 | 41.6 | 49.9 | 47.6 | 7.29 | 142.8 | 2368.9 | 447.2 | 231.6 |
| 4 g/L sinapic                     | 17.5 | 19.5 | 24.9 | 26.5 | 23.1 | 7.13 | 138.2 | 2975.4 | 587.6 | 304.8 |
| 0.5 g/L mixture of phenolic acids | 50.4 | 57.3 | 51.0 | 63.4 | 58.2 | 7.36 | 191.7 | 1565.3 | 306.3 | 168.0 |
| 1 g/L mixture of phenolic acids   | 49.2 | 57.6 | 52.5 | 64.6 | 58.4 | 7.38 | 183.6 | 1668.6 | 357.5 | 181.3 |
| 1.5 g/L mixture of phenolic acids | 46.6 | 55.4 | 52.5 | 65.7 | 57.5 | 7.31 | 163.4 | 1863.9 | 405.6 | 195.7 |
| 2 g/L mixture of phenolic acids   | 44.7 | 45.4 | 43.7 | 52.0 | 48.3 | 7.18 | 150.1 | 2038.5 | 501.2 | 278.6 |
| 4 g/L mixture of phenolic acids   | 18.3 | 21.6 | 27.7 | 29.4 | 23.3 | 7.09 | 134.2 | 3075.3 | 625.4 | 358.5 |
